# Supplementary material for: Characterization of the structure and interactions of P450 BM3 using hybrid mass spectrometry approaches
Source: PubMed Central journal article supplement (PMC7261786; doi:10.1074/jbc.ra119.011630), 2020-04-17
Supplement: supp_RA119.011630_156712_2_supp_503018_q8xky2.pdf [file supp_RA119.011630_156712_2_supp_503018_q8xky2.pdf]

## SUPPORTING INFORMATION

### Characterization of the structure and interactions of P450 BM3 using hybrid mass spectrometry approaches

Laura N. Jeffreys<sup>1</sup>, Kamila J. Pacholarz<sup>2</sup>, Linus O. Johannissen<sup>1</sup>, Hazel M. Girvan<sup>1</sup>, Perdita E. Barran<sup>1,2</sup>, Michael W. Voice<sup>3</sup> and Andrew W. Munro<sup>1\*</sup>

<sup>1</sup>The Manchester Institute of Biotechnology, School of Natural Sciences, Department of Chemistry, The University of Manchester, 131 Princess Street, Manchester M1 7DN, UK; and the <sup>1</sup>Manchester Synthetic Biology Research Centre for Fine and Speciality Chemicals (SYNBIOCHEM), The University of Manchester, 131 Princess Street, Manchester M1 7DN, UK; <sup>2</sup>Michael Barber Centre for Collaborative Mass Spectrometry, Manchester Institute of Biotechnology, University of Manchester 131 Princess Street, Manchester M1 7DN, UK; <sup>3</sup>Cypex Ltd., 6 Tom McDonald Avenue, Dundee, DD2 1NH, UK.

#### Table of contents

**Figure S1** - Native MS of full-length P450 BM3 and its component domains in ligand-free and ligand-bound states

**Table S1** - Experimentally and theoretically derived collision cross-section (CCS) values for full-length P450 BM3 and its domains

**Figure S2** - Relative deuterium uptake plots for ligand-free and ligand-bound full-length P450 BM3 dimeric protein

**Figure S3** - Coverage maps for the ligand-free P450 BM3 heme and CPR domains

**Figure S4** - Coverage maps for the ligand-bound, full-length P450 BM3 dimeric protein

**Figure S5** - The P450 BM3 residues showing the highest degree of change when comparing full-length P450 BM3 with its isolated domains

**Figure S6** - The P450 BM3 residues showing the highest degree of change when comparing ligand-free and ligand-bound full-length P450 BM3

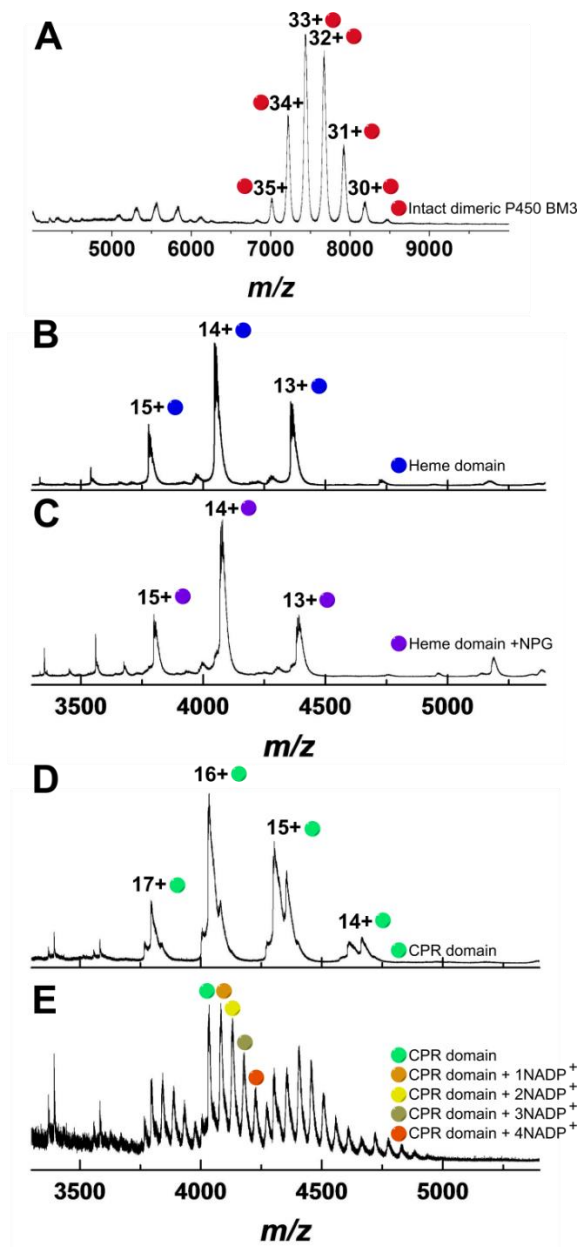

**Figure S1. Native MS of full-length P450 BM3 and its component domains in ligand-free and ligand-bound states.** **Panel A:** The native MS spectrum of full-length P450 BM3 shows multiple charge states as well as the presence of dimeric (major component) and monomeric (minor component) protein. **Panel B:** The native MS spectrum of the heme domain protein shows only three prevalent charge states. **Panel C:** The MS spectrum of the heme domain does not change significantly upon association with the tight binding BM3 substrate NPG. **Panel D:** The MS spectrum of the CPR domain shows a number of different charge states. **Panel E:** The MS spectrum of the CPR domain changes substantially on the binding of NADP<sup>+</sup> to the CPR. Multiple species are observed, corresponding to 1, 2, 3 and 4 molecules of NADP<sup>+</sup> binding to the CPR domain.

**Table S1. Experimentally and theoretically derived collision cross-section (CCS) values for full-length P450 BM3 and its domains.** CCS values were determined for the full-length, dimeric P450 BM3 protein and its component heme and reductase (CPR) domains using IM-MS with helium as the carrier gas. In addition, CCS values were determined for ligand-bound domains. Theoretical CCS values were calculated using crystallographic structures (1BU7, 4DQK and 1BVY) using the IMoS suite with helium as the carrier gas. These calculations gave CCS values of 39.1 nm<sup>2</sup> for the heme domain (13% difference to the experimental data) and 46.1 nm<sup>2</sup> for the reductase domain model (23% difference to the experimental data).

| Experimental                     |                        |       | Theoretical             | Expected mass | Measured mass     |
|----------------------------------|------------------------|-------|-------------------------|---------------|-------------------|
| Protein                          | CCS (nm <sup>2</sup> ) | STDEV | ImoS (nm <sup>2</sup> ) | Da            | Da                |
| Full-length protein              | 99.66                  | 1.21  | -                       | 239889.20     | 244915.91 ± 76.08 |
| Heme domain                      | 34.56                  | 0.17  | 39.1                    | 56147.08      | 56637.51 ± 0.71   |
| Heme domain + NPG                | 34.71                  | 0.24  | -                       | 56406.58      | 56952.95 ± 1.56   |
| CPR domain                       | 37.53                  | 1.08  | 46.1                    | 64145.98      | 64536.33 ± 30.81  |
| CPR domain + 1 NADP <sup>+</sup> | 37.05                  | 0.38  | -                       | 64889.38      | 65229.05 ± 11.67  |
| CPR domain + 2 NADP <sup>+</sup> | 37.39                  | 0.15  | -                       | 65632.78      | 66054.80 ± 2.79   |
| CPR domain + 3 NADP <sup>+</sup> | 38.03                  | 0.48  | -                       | 66376.18      | 66809.45 ± 14.95  |
| CPR domain + 4 NADP <sup>+</sup> | 38.31                  | 0.43  | -                       | 67119.58      | 67563.77 ± 20.17  |

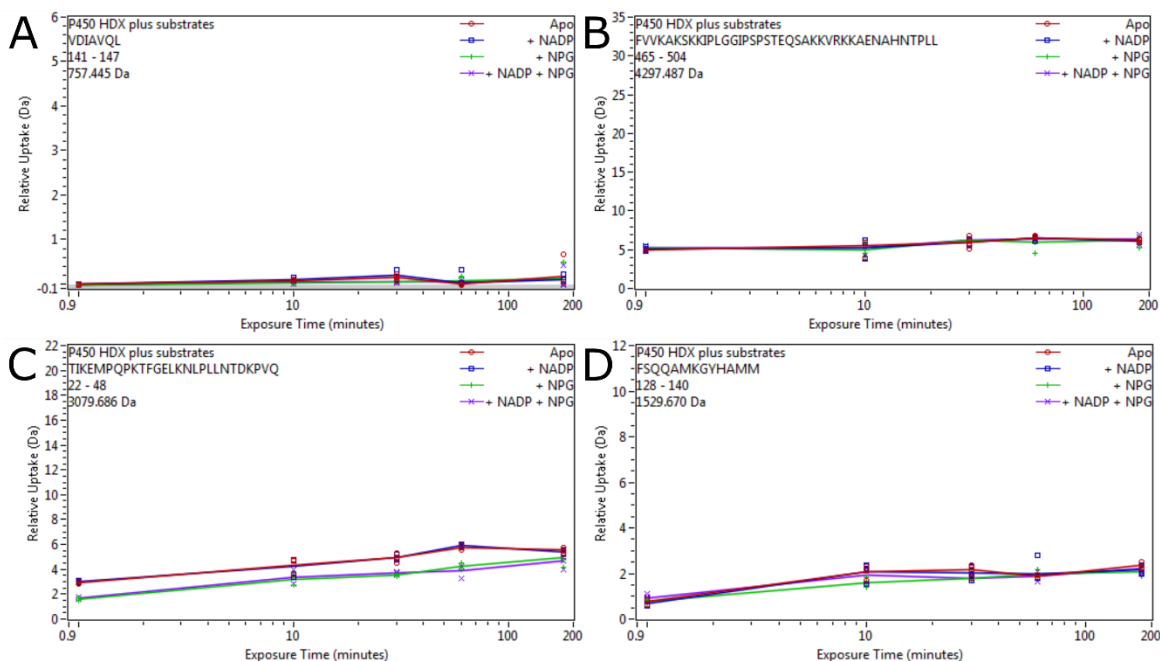

**Figure S2. Relative deuterium uptake plots for ligand-free and ligand-bound full-length P450 BM3 dimeric protein.** Using a LEAP Technologies dual-armed robot, accurate deuterium incubations could be accomplished for HDX-MS analysis. Observing the deuterium uptake from 1 minute to 180 minutes for each peptide fragment allows determination of the solvent accessibility of the protein. Four states are compared above; ligand-free (red), NADP<sup>+</sup>-bound (blue), NPG-bound (green) and NADP<sup>+</sup>/NPG-bound (purple). Plots were generated using Waters DynamX software. In Panel A a small segment of the protein exhibits very poor deuterium uptake over time. In Panel B a longer segment of the protein exhibits poor deuterium uptake over time. However, this segment begins with higher deuterium levels than Panel A. In Panels C and D deuterium uptake increases over time. However, in Panel C there is an observable difference between different ligand-bound states.

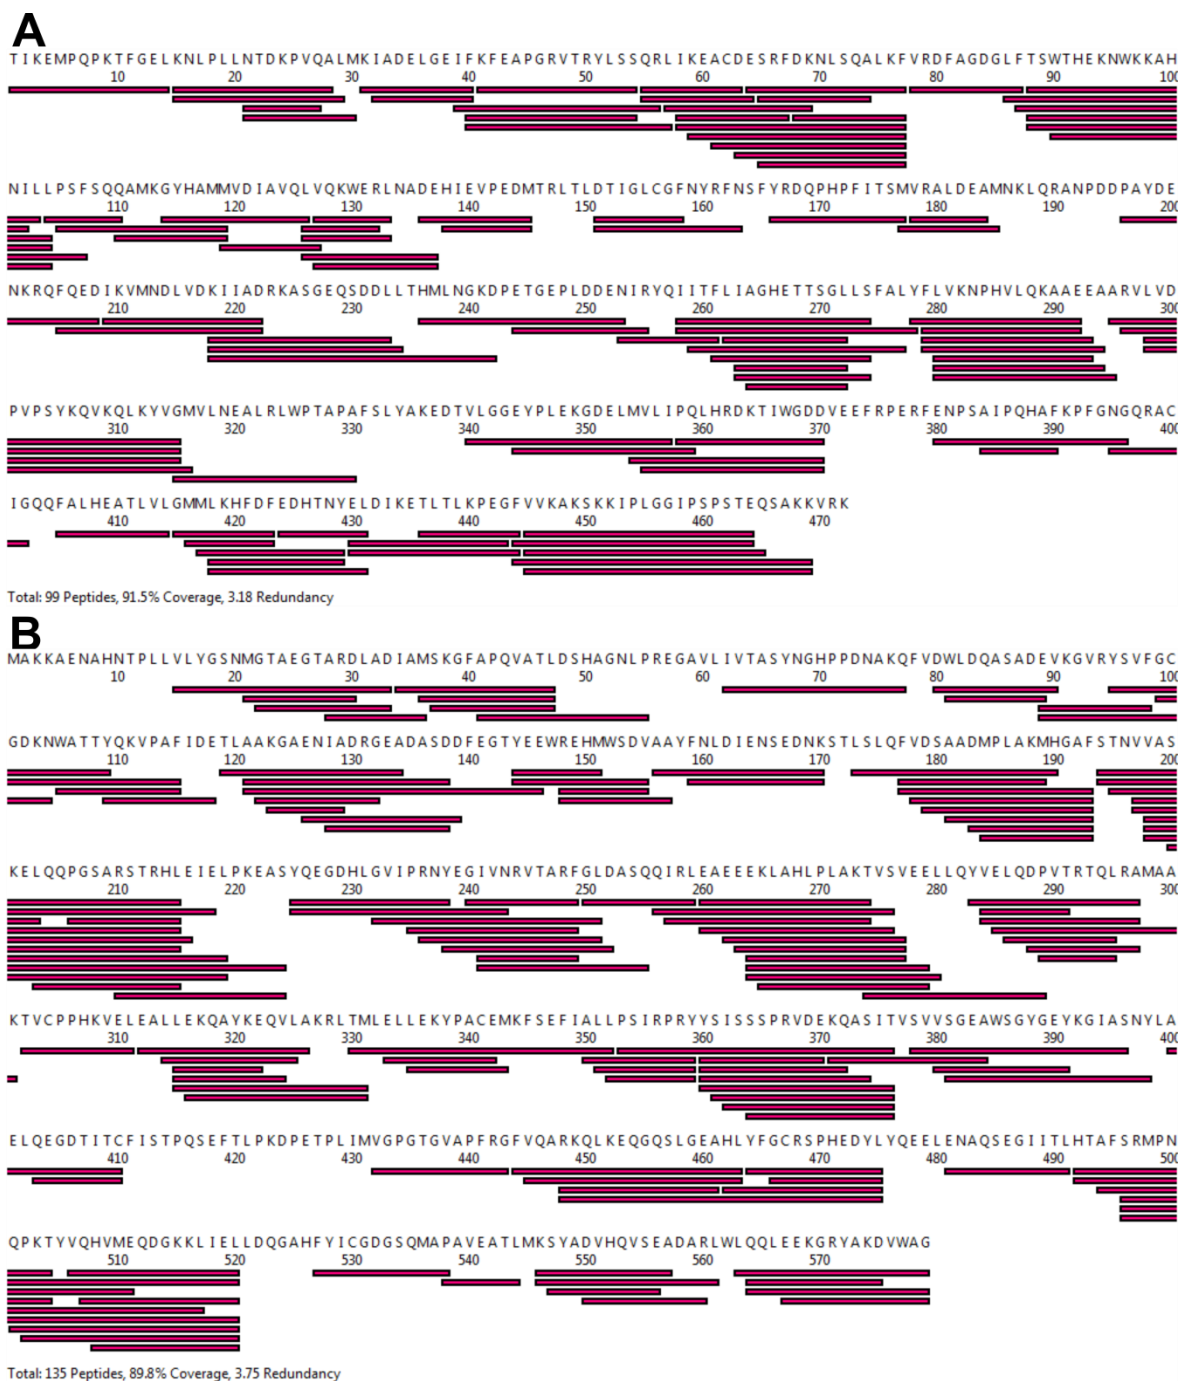

**Figure S3. The coverage maps for the ligand-free P450 BM3 heme and CPR domains. Panel A:** The heme domain HDX-MS data show 91.5% coverage with 3.18 redundancy. **Panel B:** The CPR domain data show 89.8% coverage with 3.75 redundancy.

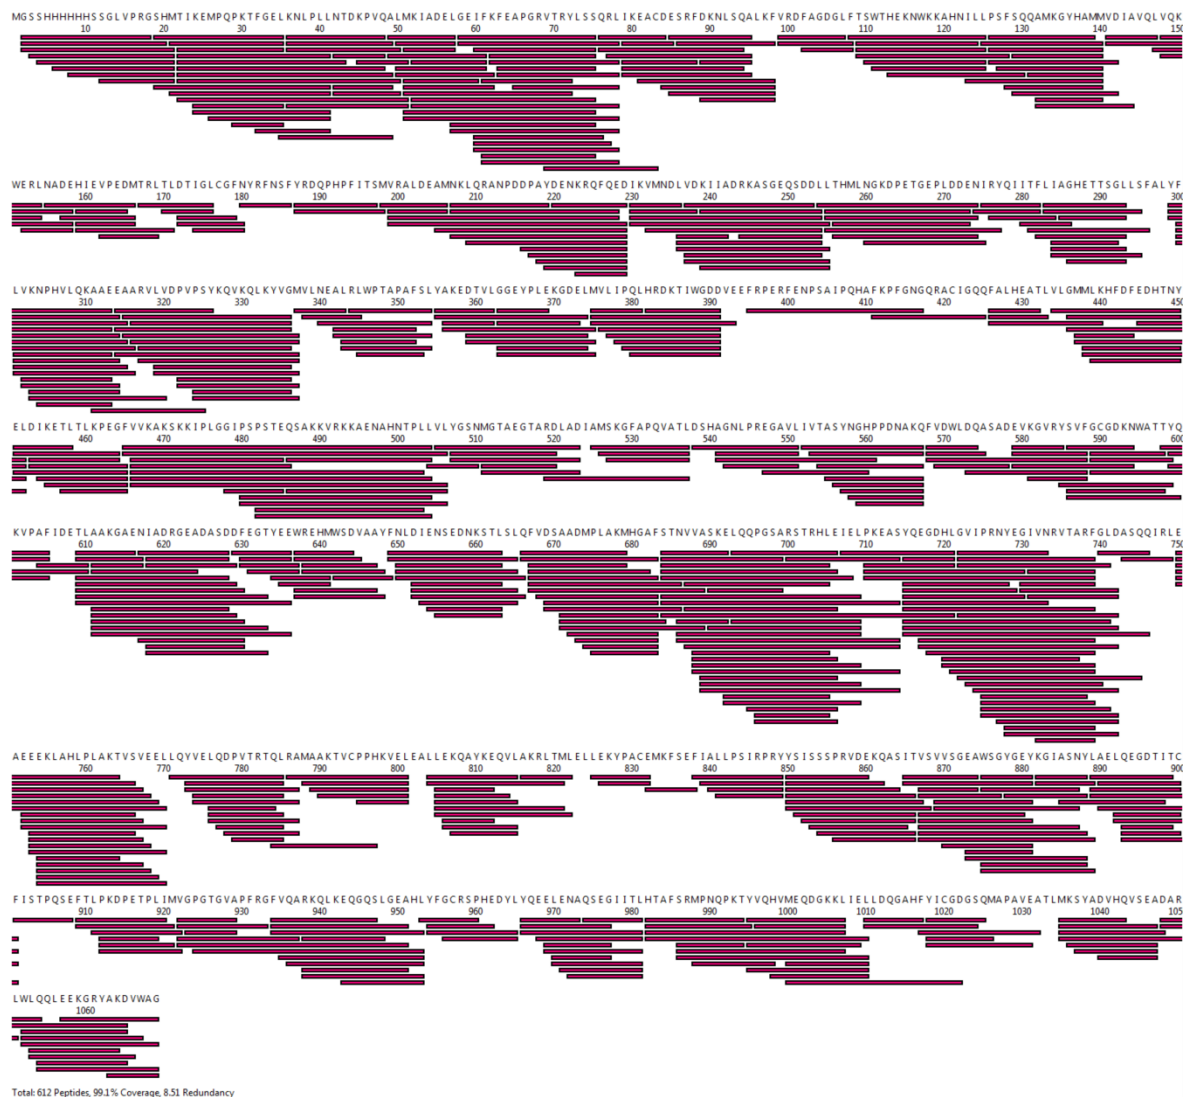

**Figure S4. The coverage maps for the ligand-bound, full-length P450 BM3 dimeric protein.** All four states of the protein (ligand-free, NADP<sup>+</sup>-bound, NPG-bound and NADP<sup>+</sup>/NPG-bound) show 99.1% coverage and 8.51 redundancy.

|            |            |            |            |             |             |
|------------|------------|------------|------------|-------------|-------------|
| MGSSHHHHHH | SSGLVPRGSH | MTIKEMPQPK | TFGELKNLPL | LNTDKPVQAL  | MKIADDELGEI |
| FKFEAPGRVT | RYLSSQRLIK | EACDESRFDK | NLSQALKFVR | DFAGDGLFTS  | WTHEKNWKKA  |
| HNILLPSFSQ | QAMKGYHAMM | VDIAVQLVQK | WERLNADEHI | EVPEDMTRLT  | LDTIGLCGFN  |
| YRFNSFYRDQ | PHPFITSMVR | ALDEAMNKLQ | RANPDDPAYD | ENKRQFQEDI  | KVMNDLVDKI  |
| IADRKASGEQ | SDDLTHMLN  | GKDPETGEPL | DDENIRYQII | TFLIAGHETT  | SGLLSFALYF  |
| LVKNPHVLQK | AAEEAARVLV | DPVPSYKQVK | QLKYVGMVLN | EALRLWPTAP  | AFSLYAKEDT  |
| VLGGEYPLEK | GDELMVLIPQ | LHRDKTIWGD | DVEEFRPERF | ENPSAIPQHA  | FKPFGNGQRA  |
| CIGQQFALHE | ATLVLGMMLK | HFDFFDHTNY | ELDIKETLTL | KPEGFVVKAK  | SKKIPLGGIP  |
| SPSTEQSAKK | VRKKAENAHN | TPLLVLVGSN | MGTAEGTARD | LADIAMSKGF  | APQVATLDSH  |
| AGNLPREGAV | LIVTASYNGH | PPDNAKQFVD | WLDQASADEV | KGVRYSVFGC  | GDKNWATTYQ  |
| KVPAFIDETL | AAKGAENIAD | RGEADASDDF | EGTYEEWREH | MWSDVAAAYFN | LDIENSEDNK  |
| STLSLQFVDS | AADMPLAKMH | GAFSTNVVAS | KELQQPGSAR | STRHLEIELP  | KEASYQEGDH  |
| LGVIPRNYEG | IVNRVTARFG | LDASQQIRLE | AEEKLAHLP  | LAKTVSVEEL  | LOYVELQDPV  |
| TRTQLRAMAA | KTVCPPHKVE | LEALLEKQAY | KEQVLAKRLT | MLELLEKYPY  | CEMKFSEFIA  |
| LLPSIRPRYY | SISSSPRVDE | KQASITVSVV | SGEAWSGYGE | YKGIASNYLA  | ELQEGDTITC  |
| FISTPQSEFT | LPKDPETPLI | MVGPGTGAVP | FRGFVQARKQ | LKEQGQSLGE  | AHLYFGCRSP  |
| HEDYLYQEEL | ENAQSEGIIT | LHTAFSRMPN | QPKTYVQHVM | EQDGKLIEL   | LDQGAHFYIC  |
| GDGSQMAPAV | EATLMKSYAD | VHQVSEADAR | LWLQQLEEKG | RYAKDVWAG*  |             |

**Figure S5. The P450 BM3 residues showing the highest degree of change when comparing full-length P450 BM3 with its isolated domains.** The residues are coloured red or cyan to indicate areas of the greatest deshielding or shielding respectively ( $\pm 5\%$  deuterium uptake), when subtracting the isolated domains from the full-length P450 BM3 protein. These residues correspond to conformational changes causing alterations in solvent accessibility. In particular, the residues highlighted in cyan correspond to the sites hypothesized to be involved with dimerization. A His-tag was used to facilitate protein purification and is shown in green. Residues with no coverage are not coloured.

**A**

|                    |                   |             |             |             |            |
|--------------------|-------------------|-------------|-------------|-------------|------------|
| <b>MGSSHHHHHHH</b> | <b>SSGLVPRGSH</b> | MTIKEMPQPK  | TFGELKNNLPL | LNTDKPVQAL  | MKIADELGEI |
| FKFEAPGRVT         | RYLSSQRLIK        | EACDESRFDK  | NLSQALKFVR  | DFAGDGLFSTS | WTHEKNWKKA |
| HNILLPSFSQ         | QAMKGYHAMM        | VDIAVQLVQK  | WERLNADEHI  | EVPEDMTRLT  | LDTIGLCGFN |
| YRFNSFYRDQ         | PHPFITSMVR        | ALDEAMNKLO  | RANPDDPAYD  | ENKRQFQEDI  | KVMNDLVDKI |
| IADRKASGEQ         | SDDLTHMLN         | GKDPETGEPL  | DDENIRYQII  | TFLIAGHETT  | SGLLSFALYF |
| LVKNPHVLQK         | AAEEAARVLV        | DPVPSYKQVK  | QLKYVGMVLN  | EALRLWPTAP  | AFSLYAKEDT |
| VLGGYEYPLEK        | GDELMVLIPO        | LHRDKTIWGD  | DVEEFRPERF  | ENPSAIPQHA  | FKPFGNGQRA |
| CIGQQFALHE         | ATLVLGMMLK        | HFDKFEDHTNY | ELDIKETLTL  | KPEGFVVKAK  | SKKIPLGGIP |
| SPSTEQSAKK         | VRKKAENAHN        | TPLLVLVYGSN | MGTAEGTARD  | LADIAMSKGF  | APQVATLDSH |
| AGNLPREGAV         | LIVTASYNGH        | PPDNAKQFVD  | WLDQASADEV  | KGVRYSVFGC  | GDKNWATTYQ |
| KVPAFIDETL         | AAKGAENIAD        | RGEADASDDF  | EGTYEEWREH  | MWSDVAAYFN  | LDIENSEDNK |
| STLSLQFVDS         | AADMPLAKMH        | GAFSTNVVAS  | KELQQPGSAR  | STRHLEIELP  | KEASYQEGDH |
| LGVIIPRNYEG        | IVNRVTARFG        | LDASQQIRLE  | AEEEKLAHLP  | LAKTVSVEEL  | LQYVELQDPV |
| TRTQLRAMAA         | KTVCPPHKVE        | LEALLEKQAY  | KEQVLAKRLT  | MLELLEKYPY  | CEMKFSEFIA |
| LLPSIRPRYY         | SISSSPRVDE        | KQASITVSVV  | SGEAWSGYGE  | YKGIASNYLA  | ELQEGDTITC |
| FISTPQSEFT         | LPKDPETPLI        | MVGPGBTGVAP | FRGFVQARKQ  | LKEQQQSLGE  | AHLYFGCRSP |
| HEDYLYQEEL         | ENAQSEGIIT        | LHTAFSRMPN  | QPKTYVQHVM  | EQDGKKLIEL  | LDQGAHFYIC |
| GDGSQMAPAV         | EATLMKSYAD        | VHQVSEADAR  | LWLQQLEEKG  | RYAKDVWAG*  |            |

**B**

|                    |                    |                    |                     |                     |                     |
|--------------------|--------------------|--------------------|---------------------|---------------------|---------------------|
| <b>MGSSHHHHHHH</b> | <b>SSGLVPRGSH</b>  | MTIK <b>EMPQPK</b> | TFGEL <b>KNNLPL</b> | LNTDKPVQAL          | MKIADELGEI          |
| FKFEAPGRVT         | RYLSS <b>QRLIK</b> | EACDESRFDK         | NLSQALKFVR          | <b>DFAGDGLF</b> TS  | <b>WTHEKNWKKA</b>   |
| <b>HNILL</b> PSFSQ | QAMKGYHAMM         | VDIAVQLV <b>QK</b> | <b>WERLNADE</b> HI  | EVPEDMTRL <b>T</b>  | <b>LDTIGLCGFN</b>   |
| YRFNSFYRDQ         | PHPFITSMVR         | ALDEAMN <b>KLO</b> | <b>RANPDD</b> PAYD  | ENKRQFQEDI          | KVMNDLVDKI          |
| IADRKASGEQ         | SDDLTHMLN          | GKDPETGEPL         | DDENIRYQII          | TFLIAGHETT          | SGLLSFALY <b>F</b>  |
| <b>LVKNPHVLQK</b>  | <b>AAEEAARVLV</b>  | <b>DPVPSYKQVK</b>  | <b>QLKYVGMVLN</b>   | EAL <b>RL</b> WPTAP | AFS <b>L</b> YAKEDT |
| VLGGYEYPLEK        | <b>GDELMVLIPO</b>  | <b>LHRDKTIWGD</b>  | DVEEFRPERF          | ENPSAIPQHA          | FKPFGNGQRA          |
| CIGQQFALHE         | ATLVLGMMLK         | HFDKFEDHTNY        | ELDIKETLTL          | KPEGFVVKAK          | SKKIPLGGIP          |
| SPSTEQSAKK         | VRKKAENAHN         | TPLLVLVYGSN        | <b>MGTAEGTARD</b>   | <b>LADIAMSKGF</b>   | <b>APQVATLDSH</b>   |
| AGNLPREGAV         | <b>LIVTASYNGH</b>  | <b>PPDNAKQFVD</b>  | <b>WLDQASADEV</b>   | <b>KGVRYSVFGC</b>   | <b>GDKNWATTYQ</b>   |
| <b>KVPAFIDETL</b>  | <b>AAKGAENIAD</b>  | <b>RGEADASDDF</b>  | <b>EGTYEEWREH</b>   | <b>MWSDVAAYFN</b>   | <b>LDIENSEDNK</b>   |
| <b>STLSLQFVDS</b>  | <b>AADMPLAKMH</b>  | <b>GAFSTNVVAS</b>  | <b>KELQQPGSAR</b>   | <b>STRHLEIELP</b>   | <b>KEASYQEGDH</b>   |
| <b>LGVIIPRNYEG</b> | <b>IVNRVTARFG</b>  | <b>LDASQQIRLE</b>  | <b>AEEEKLAHLP</b>   | <b>LAKTVSVEEL</b>   | <b>LQYVELQDPV</b>   |
| <b>TRTQLRAMAA</b>  | <b>KTVCPPHKVE</b>  | <b>LEALLEKQAY</b>  | <b>KEQVLAKRLT</b>   | <b>MLELLEKYPY</b>   | <b>CEMKFSEFIA</b>   |
| <b>LLPSIRPRYY</b>  | <b>SISSSPRVDE</b>  | <b>KQASITVSVV</b>  | <b>SGEAWSGYGE</b>   | <b>YKGIASNYLA</b>   | <b>ELQEGDTITC</b>   |
| <b>FISTPQSEFT</b>  | <b>LPKDPETPLI</b>  | <b>MVGPGBTGVAP</b> | <b>FRGFVQARKQ</b>   | <b>LKEQQQSLGE</b>   | <b>AHLYFGCRSP</b>   |
| <b>HEDYLYQEEL</b>  | <b>ENAQSEGIIT</b>  | <b>LHTAFSRMPN</b>  | <b>QPKTYVQHVM</b>   | <b>EQDGKKLIEL</b>   | <b>LDQGAHFYIC</b>   |
| <b>GDGSQMAPAV</b>  | <b>EATLMKSYAD</b>  | <b>VHQVSEADAR</b>  | <b>LWLQQLEEKG</b>   | <b>RYAKDVWAG*</b>   |                     |

**C**

|                    |                     |                   |                     |                     |                     |
|--------------------|---------------------|-------------------|---------------------|---------------------|---------------------|
| <b>MGSSHHHHHHH</b> | <b>SSGLVPRGSH</b>   | MTIKEMPQPK        | TFGEL <b>KNNLPL</b> | <b>L</b> NNTDKPVQAL | MKIADELGEI          |
| FKFEAPGRVT         | RYLSSQRLIK          | EACDESRFDK        | NLSQALKFVR          | DFAGDGLFSTS         | WTHEKNWKKA          |
| HNILLPSFSQ         | <b>QAMKGYHAMM</b>   | VDIAVQLVQK        | WERLNADEHI          | EVPEDMTRLT          | <b>LDTIGLCGFN</b>   |
| YRFNSFYRDQ         | PHPFITSMVR          | ALDEAMNKLO        | <b>RANPDD</b> PAYD  | ENKRQFQEDI          | KVMNDLVDKI          |
| IADRKASGEQ         | SDDL <b>L</b> THMLN | GKDPETGEPL        | DDENIRYQII          | TFLIAGHETT          | SGLLSFALYF          |
| LVKNPHVLQK         | AAEEAARVLV          | <b>DPVPSYKQVK</b> | QLKYVGMVLN          | EALRLWPTAP          | AFS <b>L</b> YAKEDT |
| VLGGYEYPLEK        | <b>GDELMVLIPO</b>   | <b>LHRDKTIWGD</b> | DVEEFRPERF          | ENPSAIPQHA          | <b>FKPFGNGQRA</b>   |
| <b>CIGQQ</b> FALHE | ATLVLGMMLK          | HFDKFEDHTNY       | ELDIKETLTL          | KPEGFVVKAK          | SKKIPLGGIP          |
| SPSTEQSAKK         | VRKKAENAHN          | TPLLVLVYGSN       | <b>MGTAEGTARD</b>   | <b>LADIAMSKGF</b>   | <b>APQVATLDSH</b>   |
| AGNLPREGAV         | <b>LIVTASYNGH</b>   | <b>PPDNAKQFVD</b> | <b>WLDQASADEV</b>   | <b>KGVRYSVFGC</b>   | <b>GDKNWATTYQ</b>   |
| <b>KVPAFIDETL</b>  | <b>AAKGAENIAD</b>   | <b>RGEADASDDF</b> | <b>EGTYEEWREH</b>   | <b>MWSDVAAYFN</b>   | <b>LDIENSEDNK</b>   |
| <b>STLSLQFVDS</b>  | <b>AADMPLAKMH</b>   | <b>GAFSTNVVAS</b> | <b>KELQQPGSAR</b>   | <b>STRHLEIELP</b>   | <b>KEASYQEGDH</b>   |
| <b>LGVIIPRNYEG</b> | <b>IVNRVTARFG</b>   | <b>LDASQQIRLE</b> | <b>AEEEKLAHLP</b>   | <b>LAKTVSVEEL</b>   | <b>LQYVELQDPV</b>   |
| <b>TRTQLRAMAA</b>  | <b>KTVCPPHKVE</b>   | <b>LEALLEKQAY</b> | <b>KEQVLAKRLT</b>   | <b>MLELLEKYPY</b>   | <b>CEMKFSEFIA</b>   |



LLPSIRPRYY SIISSSPRVDE KQASITVSVV SGEAWSGYGE YKGIASNYLA ELQEGDTITC  
 FISTPQSEFT LPKDPETPLI MVGPGTGVAE FRGFVQARKQ LKEQGQSLGE AHL YFGCRSP  
 HEDYLYQEEL ENAQSEGIIT LHTAFSRMPN QPKTYVQHVM EQDGKKLIEL LDQGAHFYIC  
 GDGSQMAPAV EATLMKSYAD VHQVSEADAR LWLQLEEKG RYAKDVWAG\*

**Figure S6. The P450 BM3 residues showing the highest degree of change when comparing ligand-free and ligand-bound full-length P450 BM3.** The residues are coloured red or cyan to indicate areas of the greatest deshielding or shielding respectively ( $\pm 5\%$  deuterium uptake), when subtracting ligand-free values from NADP<sup>+</sup>-bound (A), NPG-bound (B) and NADP<sup>+</sup>/NPG-bound protein (C). These residues correspond to conformational changes causing alterations in solvent accessibility. In particular, the residues highlighted in cyan correspond to the sites hypothesized to be involved with dimerization. The His-tag used to facilitate protein purification is shown in green. Residues with no coverage are not coloured.
